# Supplementary material for: Exploring thoughts of suicide
Source: HighWire-hosted journal article supplement (doi:10.1136/bmj.j1128), 2017-03-30
Supplement: bmj.j1128.pdf [file bmj.j1128.pdf]

## 实践要点

## 自杀观念探析

## Practice pointer

## Exploring thoughts of suicide

来源: BMJ 2017;356:j1128 doi: 10.1136/bmj.j1128

一名50岁的男性,主诉情绪低落。他最近失去了工作,妻子也离开了他。在咨询过程中,他表示活着没有一点意思。史密斯医生很担心,不知如何回答患者的抱怨,同时患者也回避与他的眼神沟通。

很多医生不知如何更好地评估个体的自杀风险,尤其是那些已经表达出自杀想法的患者。

自杀的研究很难开展,而且证据水平偏低。最近一项定性研究发现,依据英国全科医生的报告,他们在临床工作中很难判断出患者是否具有真正的自杀意图,很难有效评估自杀风险,也很难去处理这些高风险患者<sup>1</sup>。反复自伤的患者会引起医疗保健医生强烈的情感反应,例如愤怒、害怕或者希望拯救患者<sup>2</sup>。

临床医生不应该害怕询问自杀问题;一项综述指出,目前没有一项研究发现询问患者的自杀倾向会导致自杀风险提高<sup>3</sup>。本文旨在对以下问题提供建议:如何评估有消极观念的患者,如何完成风险评估,并且决定哪些患者更适合接受专业精神卫生团队的帮助。

## 自杀观念和自杀倾向有多常见?

自杀本身是一件非常少见的事件。在2014

## 你需要知道

- 询问自杀,并不会增加患者自杀的风险。
- 除了明确自杀的风险因素,也需要询问保护因素。
- 询问自杀,能够帮助临床医生评估风险和制定治疗方案。

年,英国每10万人中因自杀死亡者有10.8人<sup>4</sup>。依据英国和美国的数据,在2016年,有3.5%~5%的人表示有过自杀想法,仅有0.5%~0.7%的人曾尝试自杀<sup>5,6</sup>。英国的研究发现,在人的整个一生中,有五分之一的人曾经有过轻生的想法<sup>6</sup>。

## 医生如何鉴别高自杀风险人群

最近的一项荟萃分析评估了自伤和自杀的风险因素,发现仅4个风险因素具有证据支持:

- 既往自伤史
- 男性
- 失业状态
- 存在躯体健康问题。

这些因素很常见,无法帮助临床医生做出有效决策<sup>7</sup>。

更适合临床应用的是关于自杀的英国全国调查,该报告包含了20年来英国死于自杀的人群个性特征数据(表1)<sup>8</sup>。这些数据确认出4个危险因素:

- 独居
- 未婚
- 药物或酒精依赖
- 活动性精神病。

## 这些危险因素能否改变?

多数执业精神科医生将危险因素分为动态

Lindsey Sinclair  
ST6 liaison  
psychiatry<sup>1</sup>,  
Richard Leach  
general practitioner<sup>2</sup>

<sup>1</sup>Royal United  
Hospital Bath, Avon,  
UK;  
<sup>2</sup>Northlands Surgery,  
Calne, Wiltshire, UK  
Correspondence to:

L Sinclair  
lindsey.sinclair  
@bristol.ac.uk

岳玲译  
肖世富校  
上海交通大学  
医学院附属  
精神卫生中心

## 来源与选择标准

我们搜索了英国国家健康与临床优选研究所(NICE)、美国精神病学协会及皇家精神科医师学会网站的相关指南。我们检索PubMed网站,使用搜索术语 suicide+ guideline、suicide risk assessment+guideline、suicidal ideation、suicide attempted、self-harm、self-harm+risk assessment。对摘要和标题进行了参考复习。还有一部分文献已经用于指导临床日常工作。

和稳定2种<sup>12</sup>。稳定的危险因素是很难改变的,主要表现为人口学特征(比如,性别或曾经有过自伤的病史)。而另一方面,动态的危险因素是多变的,同时也是可以改变的。例如,未经治疗的抑郁症患者会有较高的自杀风险,而获得充分治疗的患者,情绪可恢复正常。其他的动态风险因素包括自伤方法(如武器)、醉酒、物质滥用、独居、失业、人际关系问题及无法摆脱困境。评估何种风险因素可以被改变,有助于制定治疗方案<sup>13</sup>。权衡所有的风险因素十分复杂,依据风险因素建立预测自杀风险的数学模型也未获成功。

是否有保护性因素?

保护性因素可以减少自杀成功的风险<sup>13</sup>。例如<sup>2</sup>:

- 坚定的宗教信仰
- 良好的家庭支持,能够帮助找到解决困境的方法
- 家中有孩子
- 对他人的责任感
- 解决问题的能力。

支持以上保护性因素的证据级别较弱。这些保护性因素的重要性在个体之间的差异较大。需要注意的是保护性因素也会改变,对一个患者来说,失去了这些保护性因素可能会增加自杀风险,例如,失去伴侣或孩子。

临床医生应该观察和感受的?

注意患者的行为表现,及他们对你投射的情感,这些都能帮助临床医生诊断和评估。比如,一个情绪低落的患者,会有强烈的厌世感,认为自己一无是处。那些表现退缩、激越或绝望的患者,存在高自杀风险。

要谨防患者主诉和临床发现不相符的情况。在一项美国的小型病例研究中,死于自杀的患者中有四分之三在临床病史中否认消极想法<sup>14</sup>。临床医生要有自己的判断力,鉴别出患者是否隐瞒病情。

如何甄别消极观念?

记录患者的消极观念,是评估患者整体精神状况的一部分,并且需要进一步分析这些消极观念。如何更好地做到这一点,临床指南和研究证据较少;基于我们的临床实践和其他研究者观察所得,建议如下:甄别消极观念,首先建立良好的医患关系。用温柔的语气询问消极观念,而不是直截了当地说“你是不是想去死?”。注意说话的方式,采用“有些人会觉得...”,这样能帮助患者更轻松地接受。比如:

- 你的情绪怎么样?
- 有时候人们会觉得心情不好,开始感觉未来没有希望了,你的感受是怎样的?
- 你是否有过轻生的想法?
- 你有过怎样的想法?
- 你是否想过用某种方式结束自己的生命?
- 你是否为自杀做过准备,比如写一份遗嘱?
- 你是否尝试过伤害自己?
- 什么样的事情使你感觉活着更有意义?

谈论自杀会令人烦躁不安,所以你的工作重点是稳定患者的情绪,比如在咨询结束前对患者给予支持和肯定。

需要制定何种临床决策?

根据你收集的信息,做出准确的自伤风险判断。必要的时候,需要进一步收集信息及询问患者。文中的框图是基于专家意见总结的临床指南<sup>2</sup>。

基于以下方面进行判断:

- 风险等级建立在正确评估患者的保护因素和危险因素,要注意这些因素也会变化
- 患者接受并执行治疗方案的意愿和程度
- 患者是否能安全回家
- 无论多么紧急,都需要患者自愿接受转诊精神科
- 与专业的精神卫生机构进行探讨,判断精神健康评估是否准确。

表1 国家机密调查中自杀患者的特征总结与普通人群人口学资料比较

| 患者特征             | 2004—2014年期间在英国死于自杀的流行病学资料 <sup>8</sup> | 在英国进行的APMS <sup>9</sup> 研究 <sup>9</sup> (2014年)或者ONS的数据 | 经校正的危害比 <sup>7</sup> |
|------------------|-----------------------------------------|---------------------------------------------------------|----------------------|
| 男性               | 66%                                     | 49.1%ONS(2011年) <sup>10</sup>                           | 2.01(1.70~2.46)      |
| 未婚               | 71%                                     |                                                         |                      |
| 独居               | 47%                                     | 31.0%ONS(2011年) <sup>10</sup>                           |                      |
| 无业               | 41%                                     | 6.4%ONS(2014年) <sup>11</sup>                            | 1.08(0.65~1.80)      |
| 既往自伤史            | 68%                                     | 反复自伤7.3%                                                | 1.68(1.38~2.05)      |
| 最近7天内与服务机构联系谈及死亡 | 49%                                     |                                                         |                      |
| 最近交谈中存在精神疾病症状    | 64%                                     |                                                         |                      |
| 乙醇滥用史            | 45%                                     | 3.1%                                                    | 1.63(1.00~2.65)      |
| 药物滥用史            | 33%                                     | 3.1%                                                    |                      |
| 主要诊断为情感障碍        | 45%                                     | 抑郁3.3%                                                  |                      |
| 主要诊断为精神分裂症       | 17%                                     | 精神病性障碍0.7%                                              |                      |
| 主要诊断为人格障碍        | 8%                                      | 筛查阳性13.7%                                               |                      |

注:<sup>9</sup>APMS: 成年精神疾病共病调查;ONS:国家统计局。

## 患者需要知道

我们非常感谢 Swindon 服务用户论坛和 Swindon 自杀患者亲属团体对本文初稿的建议。他们一直强调,在询问患者关于自伤想法时,首先要考虑到他们的内心十分敏感。

## 教育运用于实践

- 你最近是否遇到有过自伤想法的患者? 他们给你的感受是什么? 你是否有信心制定治疗计划?
- 你是否会询问你的抑郁症患者关于自伤的想法?

## 如何制定治疗计划?

治疗计划应基于风险评估的结果,并由当地卫生机构负责执行<sup>2,15</sup>。

无论哪一个医生或团队来照顾患者,也无论是否患者本人照顾自己,为消极自伤的患者制定的治疗计划需要包括以下方面:

- 是否有可以治疗的动态风险因素,比如精神疾病、乙醇或者违禁药物滥用?
- 采用何种措施能够提高安全性,并减少获得自伤的手段?
- 患者是否能够获得社会支持?
- 向相关的非官方机构提供信息,如撒玛利坦协会(Samaritans)。
- 提供如何获得实际支持的信息,如住房或金融。
- 帮助陷入严重危机的患者摆脱困境。

表2显示的是一个假想病例在英国初级保健机构中的处理流程。对患者和照护者的建议均列于表中。与患者和照护者共同制定双方均能接受的治疗计划十分重要。

贡献者(Contributions): LS had the original idea for this article, which was then written by both authors.

来源与同行评议(Provenance and peer review): Encouraged and externally peer reviewed.

We have read and understood the BMJ policy on declaration of interests and have no interests to declare.

参考文献见 bmj.com 和 bmj.yigle.com。

表2 举例说明不同自杀风险患者的应对策略

| 危险程度 | 患者的临床表现                                                                                | 建议应对策略                                                                                                                                                                                      |
|------|----------------------------------------------------------------------------------------|---------------------------------------------------------------------------------------------------------------------------------------------------------------------------------------------|
| 轻度   | 一名患者搬到朋友家中居住,但是他对未来仍然存在希望,并且还在寻找新工作。他目前没有伤害自己的念头。                                      | 在这个例子中,我们不建议将该患者转诊给精神卫生机构。该患者可以在社区保健机构进行处理。我们需要考虑的问题是:他是否存在抑郁;他是否希望寻求治疗 and 是否愿意接受治疗,或者两者都希望。作为临床医生,需要考虑给予患者提供相关服务机构的详细联系方式,比如 Samaritans 慈善团体,并告知何处能获得实际帮助。在患者离开前,与他共同讨论下次预约之前的生活计划。       |
| 中度   | 该患者独居,并有一条与之相依为命的狗。他感到有些沮丧,并开始思考要去上吊自杀。但他还没有想好要在哪里做这件事情,也没有去买绳子。他希望能接受治疗,并承认自己需要帮助。    | 在这个例子中,首先需要考虑这个患者是否可以像第一个例子那样去初级保健机构,或者说他在当地社区精神卫生团队就诊存在多大的风险。我们需要与这个患者进行开放式的讨论,了解他的支持系统,以明确他是否有朋友或者家人能帮助他度过这个难关。向患者提供相关服务机构如 Samaritans 慈善团体的联系方式,并告知何处能获得实际的帮助。在患者离开前,与他共同讨论在下次预约之前的生活计划。 |
| 重度   | 这个患者独居,最近送走了他的狗,并且更改了他的遗嘱。他感到绝望,买了一根绳子,也想好了要去哪里上吊以了却生命。他有严重的抑郁情绪,看不到治疗的希望,觉得“什么都改变不了”。 | 首先要紧急联系当地精神卫生服务机构。我们需要考虑的是该患者独自离开住所是否安全,有没有什么措施能够控制危险因素,比如寻找朋友的陪伴和把危险的绳子处理掉。与精神卫生服务机构和心理健康专家进行讨论,考虑是否需要精神卫生评估。                                                                              |

BMJ takes no responsibility for the accuracy of the translation from the published English language original and is not liable for any errors that may occur.

## 对患者和照护者的一些建议

### 支持性机构

*Samaritans*(撒玛利坦协会):

英国慈善团体,专门为那些深陷痛苦而无法应对的群体提供每周7天、每天24小时服务的咨询热线服务。

电话:116 123。http://www.samaritans.org/

*Self injury support* (自伤帮助组织):

总部位于英国布里斯托尔(Bristol)的慈善机构,利用兼职时间为妇女提供热线电话支持,为24岁以下的女性提供文字交流性支持。他们的网站有一份完整的名单,包括了英国的自伤慈善和支持机构。http://www.selfinjurysupport.org.uk/

*CALM*(平静组织):

一个旨在防止男性自杀的全国性慈善机构。他们的热线电话全年开放,从下午5点至晚上12点。电话:0800 58 58 58。https://www.thecalmzone.net/

*SANE*(身心健康组织):

一个国家支持的慈善机构,主要针对那些患有精神疾病,包括自伤的患者。服务热线全年开放:0300 304,7000,从下午6点到晚上11点。http://www.sane.org.uk/home

### 网站

*National self harm network*(国家自伤网络):

该网站提供相关论坛,自伤者可以从有相似处境的患者处获得支持和帮助。http://nshn.co.uk/

*SelfharmUK* (英国自伤网):

一个提供与自伤相关的信息和建议的网站。https://www.selfharm.co.uk/

*Royal College of Psychiatrists*(皇家精神科医师学会):

提供帮助自伤者的宣传手册。http://www.rcpsych.ac.uk/healthadvice/problemsdisorders/self-harm.aspx.
